# Supplementary material for: Ciliary and extraciliary Gpr161 pools repress hedgehog signaling in a tissue-specific manner
Source: eLife. 2021 Aug 4;10:e67121. doi: 10.7554/eLife.67121 (PMC8378848; doi:10.7554/eLife.67121)
Supplement: Figure 1—source data 1. [file elife-67121-fig1-data1.xlsx]

## Sheet: Sheet1
Figure 1C
WT-OTP			WT-si INPP5E			Mut1-OTP			Mut1-si INPP5E
GPR161 +	TULP3 +		GPR161 +	TULP3 +		GPR161 +	TULP3 +		GPR161 +	TULP3 +
86.9	40.5		100	82.4		0	30.5		0	83.9
85.5	20.2		97.8	72		0	51.6		0	86.1
96	11		95.6	80		0	27.4		0	91
86.3	15		97.2	88.9		0	24.1		0	94.4
91.8	6.2		97.1	91.3		0	32.1		0	87.4
			98.1	86.7		0	27.8
			100	96.7		0	26.3
			99.1	97.3		0	23.7
						0	31.8
						0	18.8
						0	15.1
						0	21
						0	20.5
						0	17.1
						0	15.8
