# Supplementary material for: Ciliary and extraciliary Gpr161 pools repress hedgehog signaling in a tissue-specific manner
Source: eLife. 2021 Aug 4;10:e67121. doi: 10.7554/eLife.67121 (PMC8378848; doi:10.7554/eLife.67121)
Supplement: Figure 1—source data 2. [file elife-67121-fig1-data2.xlsx]

## Sheet: Sheet1
Fugure 1E							Figure 1F
Ciliary Gpr161-GFP intensity							Ciliary TULP3 intensity
WT-control	WT-si INPP5E		Mut1-Control	Mut1-si INPP5E			WT-Control	WT-si INPP5E		Mut1-Control	Mut1-si INPP5E
25587.7	11761.1		-1382.36	103.46			0	5587.67		203.833	3748.92
27117.4	15112.9		-1806.22	-175.63			0	5587.67		862.197	10218.2
27321.3	15219.2		-363.22	-679.81			0	7117.43		0	11293.6
28014.5	17446.5		-41.09	212.13			0	7117.43		0	11597.8
28942.9	18324		-38.76	-185.8			0	7321.27		0	13787.3
29866.5	18374.2		215.48	2023.3			0	7321.27		855.764	14112.9
31047.8	19186.9		29.97	-1254.32			1943.38	8014.55		0	14219.2
31341.9	20088.1		-515.7	-271.94			873.078	8014.55		0	15233.8
32577.8	20286.9		169.24	594.23			1217.02	8942.87		0	16090.6
33760.2	20501.9		-990.86	-347.3			714.666	8942.87		883.907	16446.5
33762	21235.6		319.57	596.82			1820.43	9866.52		912.115	17374.2
34191.9	21559.3		1956.47	73.86			1470.59	9866.52		781.44	18186.9
45467	22195.4		1014.6	40.4			0	11047.8		994.916	10088.1
49819.6	22755.5		870.18	-538.3			0	11047.8		0	10286.9
17090.7	23578.8		-148.96	537.24			0	11341.9		0	10501.9
26017.8	23768.8		101.75	308.64			0	11341.9		948.19	11235.6
27826.1	23902.1		618.05	-862.94			1467.2	11701.3		957.173	11559.3
28865.8	24669.8		120.12	1304.46			1336.04	12577.8		855.556	12195.4
29479.7	26230.2		-73.91	1385.56			1404.86	12577.8		1031.08	12755.5
29594.6	26377.4		816.65	240.04			1380.35	12663.3		1489.87	13578.8
30564.5	27146.8		128.28	462.67			1386.62	13150.6		1235.04	13768.8
31869.7	31316.4		1081.04	2161.7			1361.76	13762		2205.58	13867.5
32147.5	31387		374.42	1456.72			1585.28	13762		1416.02	13902.1
34850.9	33161.5		293.83	47.48			1083.91	15519.3		1976.97	14669.8
36278.3	33833.4		97.15	-528.98			1089.71	16087.8		1268.91	16017.8
36349.7	42283.6		702.29	-437.48			1043.09	17370.8		2313.78	16230.2
36459.4	42341.7		-257.41	611.24			1486.33	17607.7		1441.4	17826.1
36623.8	42462.3		389.1	3617.03			1406.72	20163.2		41.36	18865.8
37577.5	42605.1		-1503.09	-649.39			1188.04	20163.2		1817.57	19479.7
37913.9	43610		-486.99	6363.34			2537.14	22330.9		881.742	19594.6
38094.2	54528.5		-2056.52	-229.5			1977.07	25223.9		2072.62	20564.5
38631.5	33130.9		-1381.68	1502.88			1241.4	25524.4		1508.92	20787.8
42250.6	69358.9		-537.19	660.46			1702.59	26156.6		4292.9	21316.4
42446.2	75401.4		108.37	-5973.11			1380.56	26248.4		1274.46	21387
47279.6	20083.5		115.348	1997.8			1217.44	28333.1		3154.84	21869.7
49332.7	24110.8		79.5268	-3217.76			1094.25	28608.5		2033.88	22147.5
2446.18	38244.1		114.08	2500.76			1126.82	29388.3		2362.72	23161.5
7279.62	38572.2		79.192	1078.61			1047.28	29457		1519.74	23833.4
9332.71	41366.6		103.096	7.84			1571.03	29516.2		564.48	24850.9
10176.2	60371.9		41.6307	-206.9			1094.27	31032.6		1047.75	25255
14859	39997.1		88.0608	9.66			1211.15	32796.2		1341.89	26278.3
15763.6	91366.6		45.0811	9.74			1129.44	38572.6		1869.71	26349.7
16924.7	25401.4		104.23	-784.38			1947.86	27321.3		2147.45	26459.4
21815.4	70083.5		114.835	93.61			2289.31	27117.4		2577.77	26623.8
23889.7	68162.5		96.779	380.84			1373.18	28942.9		3760.16	27577.5
39411.6	28284.7		113.644	45.5			1634.43	29866.5		3761.98	27913.9
6459.42	88572.2		110.382	-2.14			1885.96	25587.7		4191.93	28094.2
6623.83	51920.9		292.682	171.93			1283.47	32577.8		4850.88	28290.8
7577.48	88244.1		94.9139	157.81			1666.93	31047.7		6278.3	28631.5
7913.92	19358.9		298.41	35.28			951.83	31341.9		6349.73	31189.3
8094.2	54210.3		125.324	622.93			1216.82	28014.5		6459.42	32250.6
8631.5	74110.8		205.664	-169.19			937.427	33762		26.32	32446.2
9411.57	58967.3		104.028	-98.18			1206.9	33161.5		564.3	32464
2250.63	34291.4		125.007	95.93			795.377	18374.2		6623.83	32605.1
2446.18	65652.4		202.156	-12.6			753.706	33833.4		7577.48	33067.2
5466.96	30787.8		71.8241	138.16			732.202	21235.6		7913.92	33610
7279.62	58844.3		123.734	-147.51			741.532	42605.1		8094.2	37279.6
9332.71	42464						828.845	31387		8631.5	39332.7
9819.62							1254.9				40176.2
							801.844				44859
							1253.01				45763.7
							766.228				46924.7
							941.514				48844.3
											53889.7
