# Supplementary material for: Ciliary and extraciliary Gpr161 pools repress hedgehog signaling in a tissue-specific manner
Source: eLife. 2021 Aug 4;10:e67121. doi: 10.7554/eLife.67121 (PMC8378848; doi:10.7554/eLife.67121)
Supplement: Figure 1—source data 3. [file elife-67121-fig1-data3.xlsx]

## Sheet: Sheet1
Figure 1G cAMP levels
Nil	13.7852
	11.0046
	10.8142
Nil Dox	11.0046
	10.9242
	11.9452
Gpr161 wt	10.1042
	9.5007
	9.45743
Gpr161 wt Dox	89.9541
	108.945
	99.4995
Gpr161 mut1	12.7854
	11.0482
	14.0232
Gpr161 mut1 Dox	149.663
	179.738
	133.69
