# Supplementary material for: Ciliary and extraciliary Gpr161 pools repress hedgehog signaling in a tissue-specific manner
Source: eLife. 2021 Aug 4;10:e67121. doi: 10.7554/eLife.67121 (PMC8378848; doi:10.7554/eLife.67121)
Supplement: Figure 2—source data 1. [file elife-67121-fig2-data1.xlsx]

## Sheet: Sheet1
Figure 2E
Gpr161 expression levels
wt/wt	1	1	1.22
ko/wt	0.58	0.46	0.73	0.57	0.7
Mut1/wt	1.439	1.183	0.835	0.687
ko/ko	0	0	0.01
ko/Mut1	0.38	0.43	0.62
Mut1/Mut1	1	1.36
