# Supplementary material for: Ciliary and extraciliary Gpr161 pools repress hedgehog signaling in a tissue-specific manner
Source: eLife. 2021 Aug 4;10:e67121. doi: 10.7554/eLife.67121 (PMC8378848; doi:10.7554/eLife.67121)
Supplement: Figure 4—figure supplement 1—source data 1. [file elife-67121-fig4-figsupp1-data1.xlsx]

## Sheet: Table 1
Source data Figure 4-figure supplement 1
		wt/wt		ko/ko		ko/Mut1		Mut1/Mut1
		1	1	1.224	0.791	1.327	0.794	1.164	1.074
Gli2FL Mean±SD
		1		1.01±0.31		1.06±0.38		1.12±0.06
Gli2R Mean±SD		1	1	0.779	0.731	0.699	0.897	0.863	0.948
		1		0.76±0.03		0.80±0.14		0.91±0.06
