# Supplementary material for: Ciliary and extraciliary Gpr161 pools repress hedgehog signaling in a tissue-specific manner
Source: eLife. 2021 Aug 4;10:e67121. doi: 10.7554/eLife.67121 (PMC8378848; doi:10.7554/eLife.67121)
Supplement: Figure 4—source data 1. [file elife-67121-fig4-data1.xlsx]

## Sheet: Sheet1
Figure 4A
Gli1 expression levels
wt/wt	1	1	1.21
ko/wt	1.15	1.24	1.13	0.94	1.36
Mut1/wt	1.388	1.141	1.452	1.193
ko/ko	3.78	2.8	2.1
ko/Mut1	2.21	2.76	1.84
Mut1/Mut1	1.4	1.58
Figure 4B
Ptch2 expression levels
wt/wt	1	1	0.99
ko/wt	1.06	1.26	1.04	0.88	1.21
Mut1/wt	1.083	0.89	1.058	0.87
ko/ko	2.55	2.74	1.79
ko/Mut1	2.55	2.25	1.53
Mut1/Mut1	1.8	1.12
