# Supplementary material for: Ciliary and extraciliary Gpr161 pools repress hedgehog signaling in a tissue-specific manner
Source: eLife. 2021 Aug 4;10:e67121. doi: 10.7554/eLife.67121 (PMC8378848; doi:10.7554/eLife.67121)
Supplement: Figure 4—source data 2. [file elife-67121-fig4-data2.xlsx]

## Sheet: Table 1
Source data Figure 4C
		wt/wt		ko/wt		mut1/wt		ko/ko		ko/mut1		mut1/mut1
		1	1	1.455	1.063	0.973	1.168	1.504	2.068	1.326	1.939	1.162	2.315
Gli1 Mean±SD
		1		1.26±0.28		1.07±0.14		1.79±0.40		1.63±0.43		1.74±0.82
		wt/wt			ko/wt			mut1/wt			ko/ko			ko/mut1			mut1/mut1
		1	1	1	0.904	1.158	0.931	1.015	1.05	0.951	0.382	0.322	0.647	0.905	0.65	0.573	0.607	0.448	1.185
Gli3FL Mean±SD
		1			1.00±0.14			1.01±0.05			0.45±0.17			0.71±0.17			0.75±0.39
		1	1	1	0.593	0.86	0.678	0.773	1.127	0.871	0.203	0.267	0.582	0.333	0.431	0.643	0.577	0.575	1.036
Gli3R Mean±SD
		1			0.71±0.14			0.92±0.18			0.35±0.20			0.47±0.16			0.73±0.27
Gli3FL/R Mean±SD		0.646	0.849	0.692	0.984	1.144	1.144	0.849	0.791	0.791	1.218	1.023	1.022	1.753	1.28	1.281	0.679	0.662	0.661
		0.73±0.11			1.09±0.09			0.81±0.03			1.09±0.11			1.44±0.27			0.67±0.01
