# Supplementary material for: Ciliary and extraciliary Gpr161 pools repress hedgehog signaling in a tissue-specific manner
Source: eLife. 2021 Aug 4;10:e67121. doi: 10.7554/eLife.67121 (PMC8378848; doi:10.7554/eLife.67121)
Supplement: Figure 4—source data 3. [file elife-67121-fig4-data3.xlsx]

## Sheet: Sheet1
Figure 4E
% of Gli2 positive cilia
	DMSO	DMSO		SAG	SAG
Gpr161 WT	17.14	22.77		55.7	55.06
Gpr161 ko	60.29	64.52		63.56	58.02
Gpr161ko + WT	19.05	16.67		61.61	57.14
Gpr161 ko + Mut1	61.47	60.38		60.75	58.16
