# Supplementary material for: Ciliary and extraciliary Gpr161 pools repress hedgehog signaling in a tissue-specific manner
Source: eLife. 2021 Aug 4;10:e67121. doi: 10.7554/eLife.67121 (PMC8378848; doi:10.7554/eLife.67121)
Supplement: Figure 6—source data 1. [file elife-67121-fig6-data1.xlsx]

## Sheet: Table 1
Source data Figure 6D
		wt/wt HL			wt/wt FL			mut1/mut1 HL			mut1/mut1 FL
		1	1	1	1	1	1	0.521	1.064	1.171	0.931	1.112	0.889
Gli3FL Mean±SD
		1			1			0.91±0.20			0.97±0.07
		1	1	1	1	1	1	0.329	0.487	0.62	0.659	0.291	0.22
Gli3R Mean±SD
		1			1			0.48±0.08			0.39±0.13
Gli3FL/R Mean±SD		0.53	0.75	0.76	0.52	0.63	0.51	0.84	1.64	1.43	0.73	2.42	2.07
		0.68±0.13			0.55±0.07			1.31±0.41			1.74±0.89
