# Supplementary material for: Ciliary and extraciliary Gpr161 pools repress hedgehog signaling in a tissue-specific manner
Source: eLife. 2021 Aug 4;10:e67121. doi: 10.7554/eLife.67121 (PMC8378848; doi:10.7554/eLife.67121)
Supplement: Figure 7—source data 1. [file elife-67121-fig7-data1.xlsx]

## Sheet: Sheet1
Figure 7D
Distance between nasal pits
	WT	Mut1	Wnt1Cre
E12.5	0.24	0.52	0.59
	0.29	0.74	0.74
	0.24	0.55	0.79
	0.25		0.84
	0.27
Figure 7E
Distance between nasal pits
	WT	Mut1
E13.5	0.18	0.62
	0.29	0.73
	0.2	0.66
