# Supplementary material for: Ciliary and extraciliary Gpr161 pools repress hedgehog signaling in a tissue-specific manner
Source: eLife journal article supplement (doi:10.7554/elife.67121), 2021-08-04

# A

*Gpr161* Exon 4 mutation

V K A R K A A A A A  
 GTCAAGGCCCGAAAG → GcCgcGGCCgcAgcG  
NotI

ctaaatgttttttaaaggcaatacagaaagcaacagcaagcaaatagaaagcagattaggataattcctctctcccctc  
 cctgtcttcttttctagCTACTACGCCGTCCTGTATCCAATGGTGTACCCCATGAAGATCACAG  
 GGAACCGAGCTGTGATGGCTCTCGTCTACATCTGGCTCCACTCTCTCATTGGCTGT  
 CTGCCGCCCTATTTGGTTGGTCATCGGTGGAGTTTGATGAGTTCAAGTGGATGTG  
 TGTGGCCGCGTGGCACCAGGAACCCGGCTACACCATTTTCTGGCAGATCTGGTGT  
 GCCCTGTTCCCTTTTCTCATCATGCTAGTGTGCTACGGTTTCATCTTCCGGGTGGC  
 CAGG**GcCgcGGCCgcAgcG**GTGCACTGTGGCACGGTGGTCACTGTGGAGGAGGA  
 CTCTCAGAGGAGCGGGAGGAAGAATTCTAGTACCTCCACTTCCTCCTCCGGCAGT  
 AGGAGGAATGCCCTTCAAGGAGTGGTCTATTCAGCTAACCAGTGCAAAGCCCTCAT  
 CACCATCCTGGTGGTCATTGGCGCCTTCATGGTCACTGGGGCCCTACATGGTT  
 GTCATTACCTCAGAGGCACTCTGGGGGAAGAACTGTGTCTCCCCAACCCCTGGAGA  
 CTTGGGCCACATGGCTGTCCTTTACCAGTGCCATCTGCCACCCTCTGATCTACGGA  
 CTCTGGAACAAGACTGTGCGCAAGGAGCTCCTGGGCATGTGCTTTGGGGACCGT  
 TATTACCGGGAATCCTTTGTGCAGCGACAGAGGACCTCCAGGCTCTTCAGCATTTC  
 CAACAGGATCACAGgtaactaggaaaaagaccctcacacctcaggcagatgtcaccggggtccttcccagtg  
 gctaagggcagtgtaggggtggctgtggtctcaaggctgaagcgccgcGAAGTTCCTATTCTCTAGAAA  
 GTATAGGAACTTCattctaccgggtaggggaggcgctttccaaggcagtcaggagcatgcg

# B

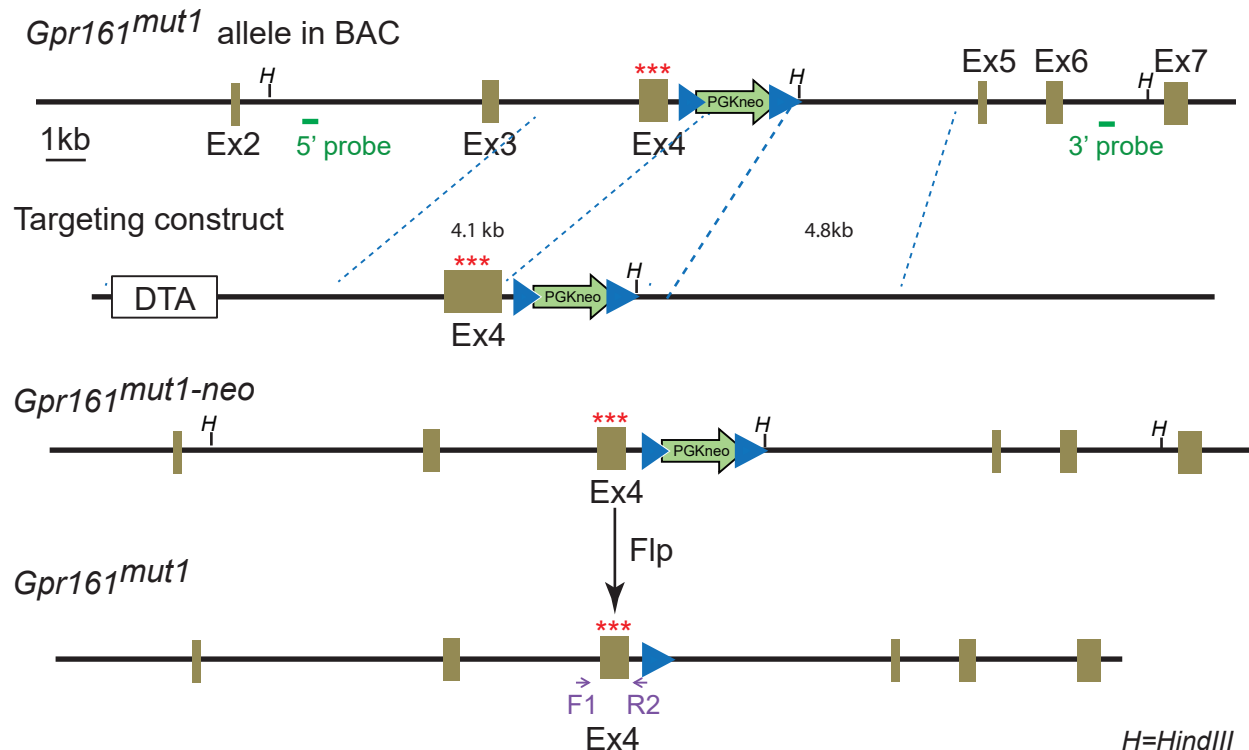

Supplement: supp [file elife-67121-supp-v1.zip]
