# Supplementary figures and images for: Ciliary and extraciliary Gpr161 pools repress hedgehog signaling in a tissue-specific manner
Source: eLife journal article supplement (doi:10.7554/elife.67121), 2021-08-04

# Hwang\_Figure 1- Supplement 3

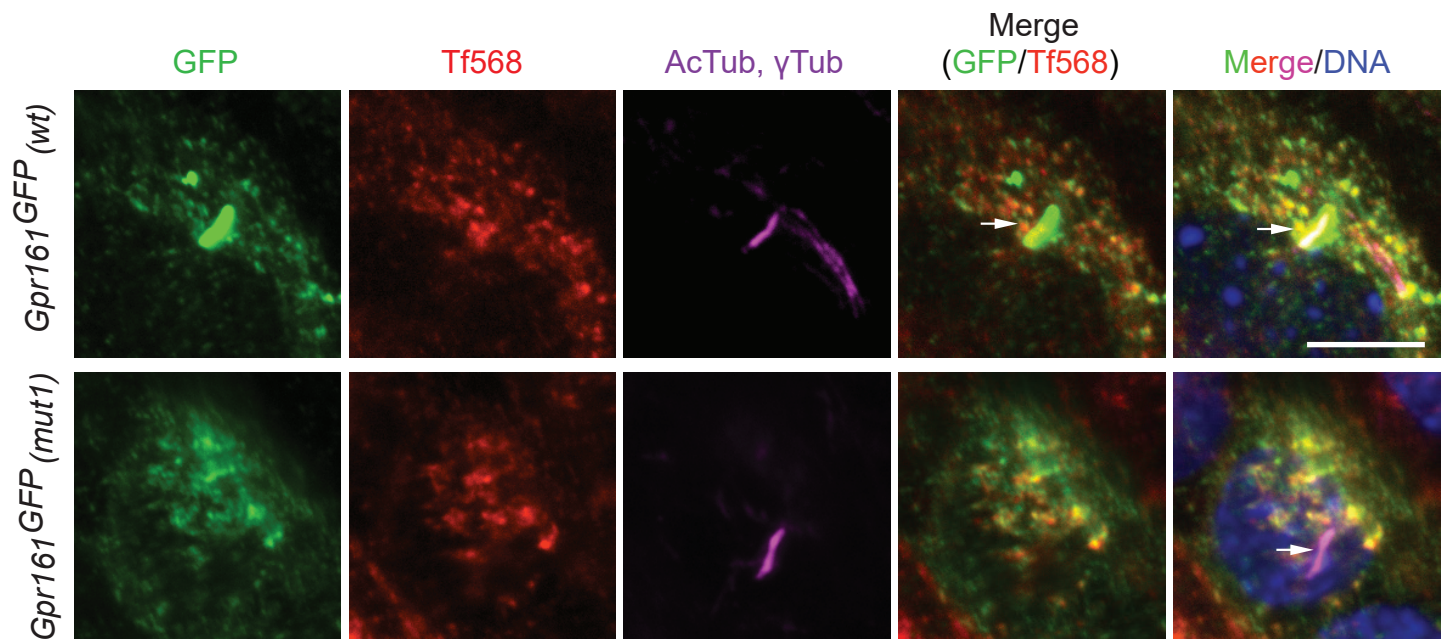

Supplement: supp [file elife-67121-supp-v1.zip]

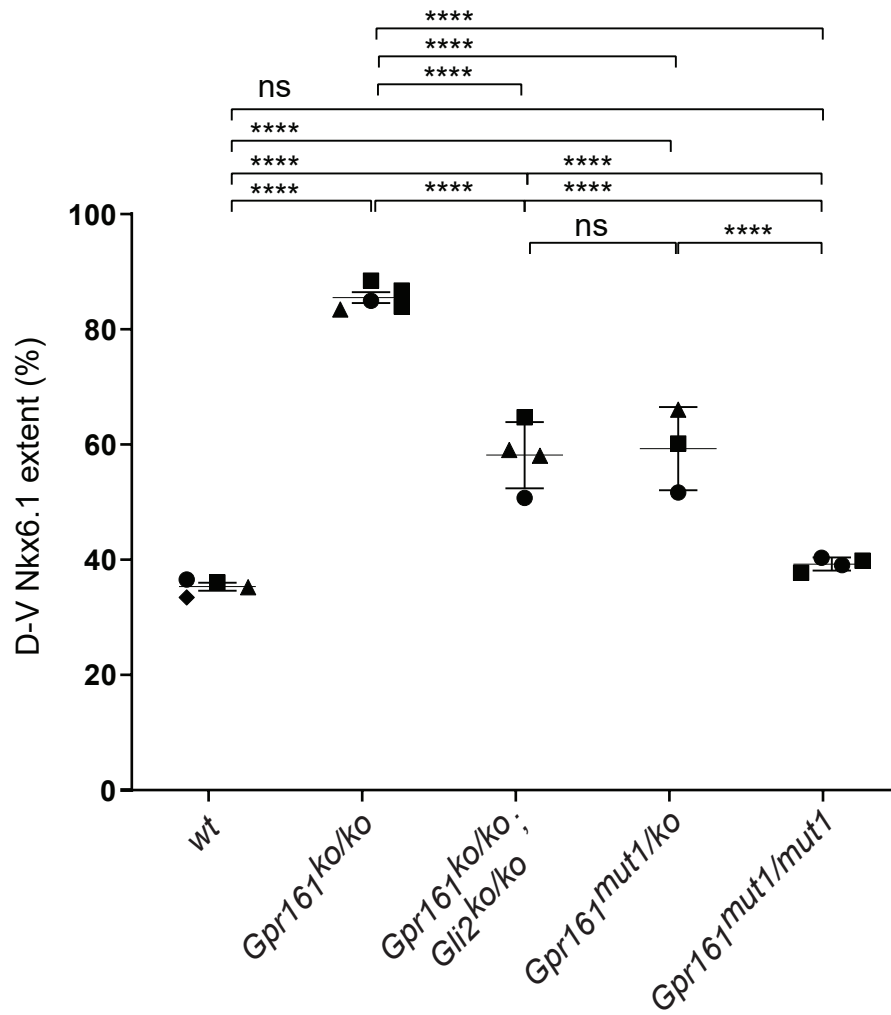

Supplement: supp [file elife-67121-supp-v1.zip]

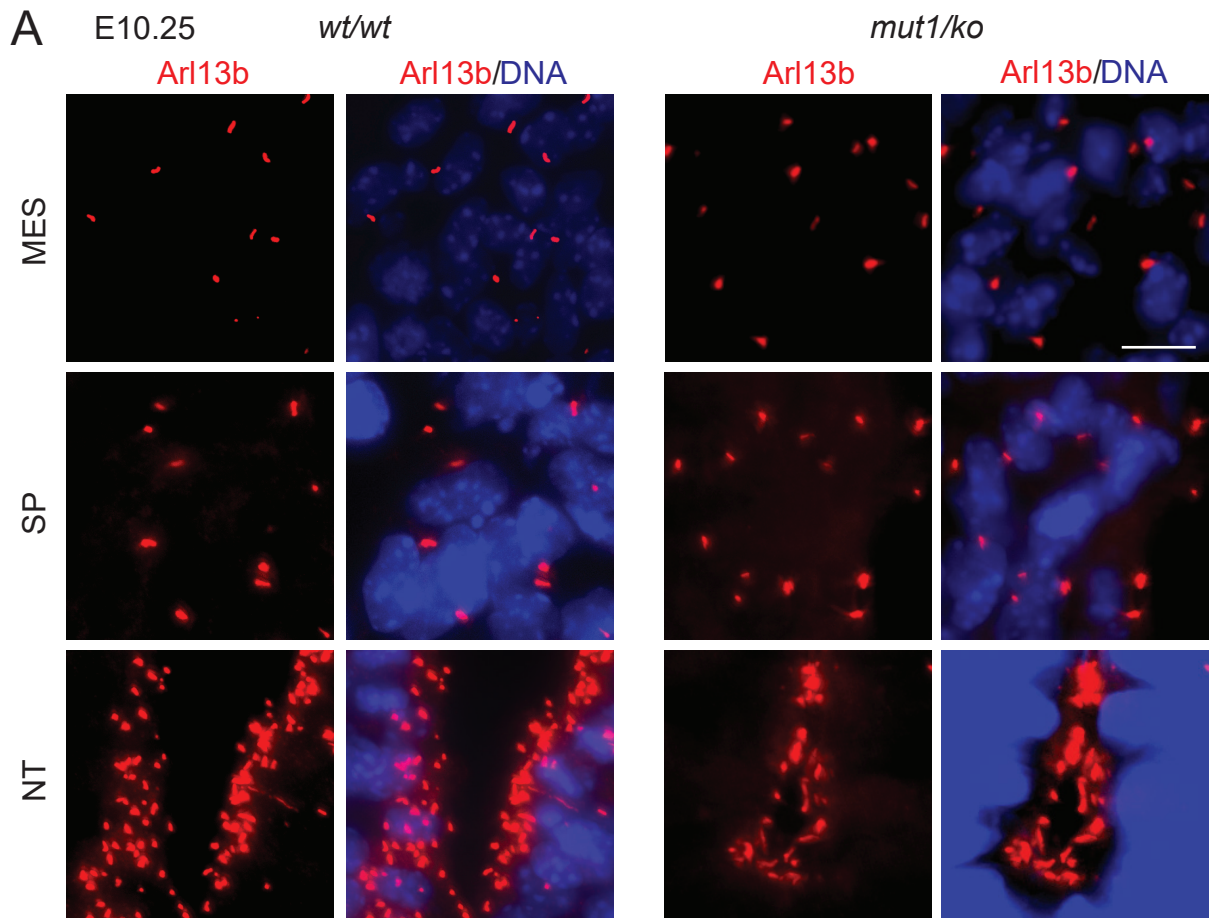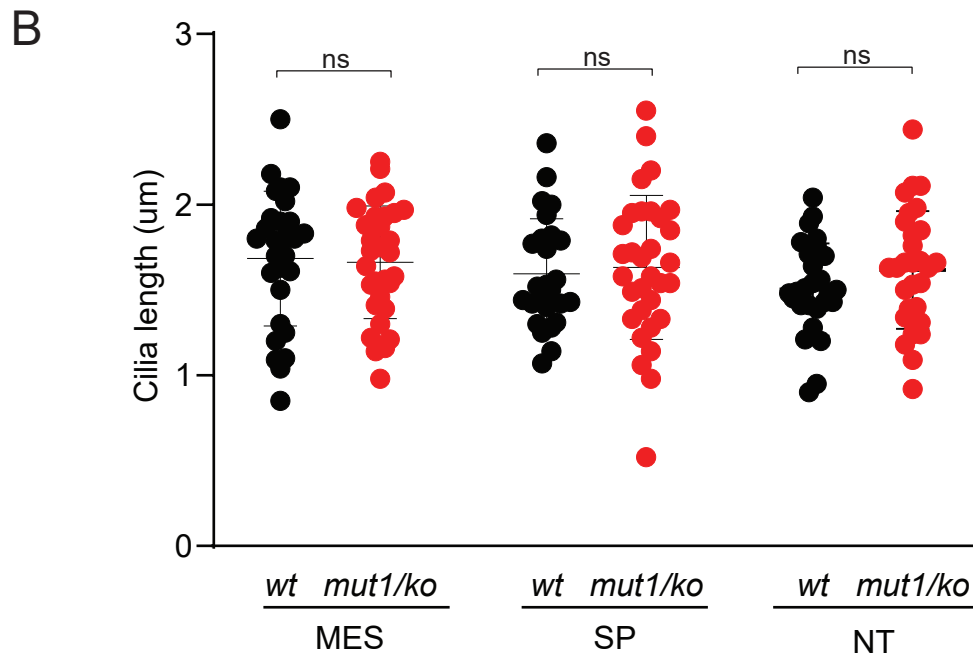

Supplement: supp [file elife-67121-supp-v1.zip]

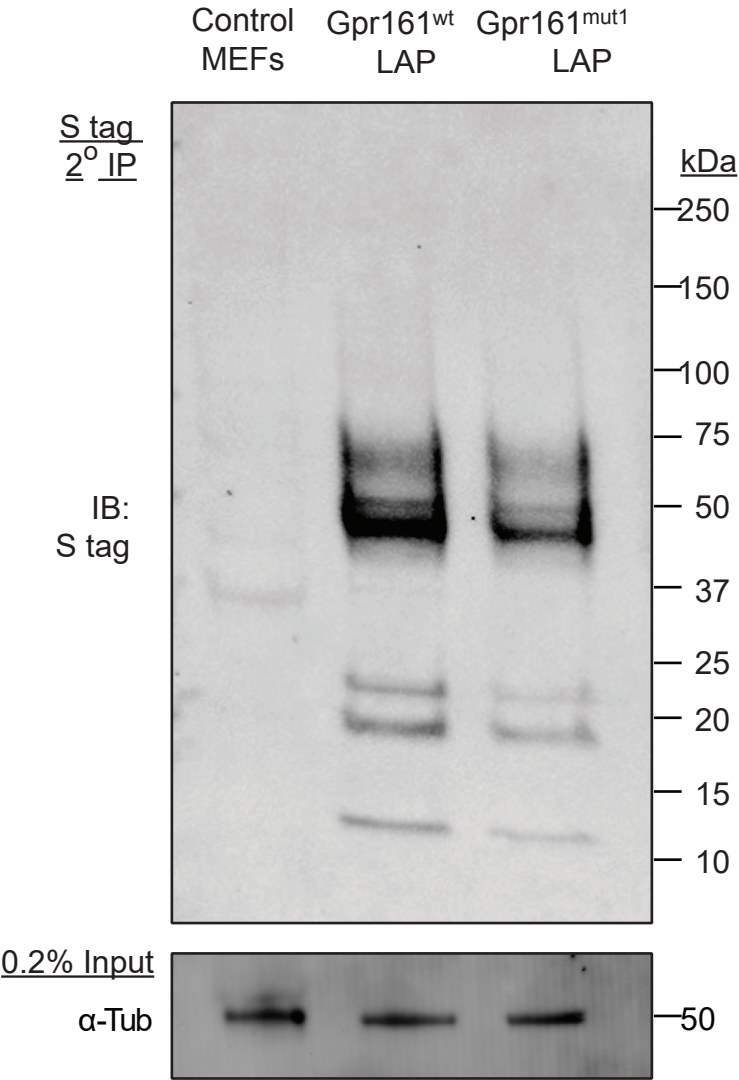

Supplement: supp [file elife-67121-supp-v1.zip]

Arrb1/Arrb2 dko MEFs

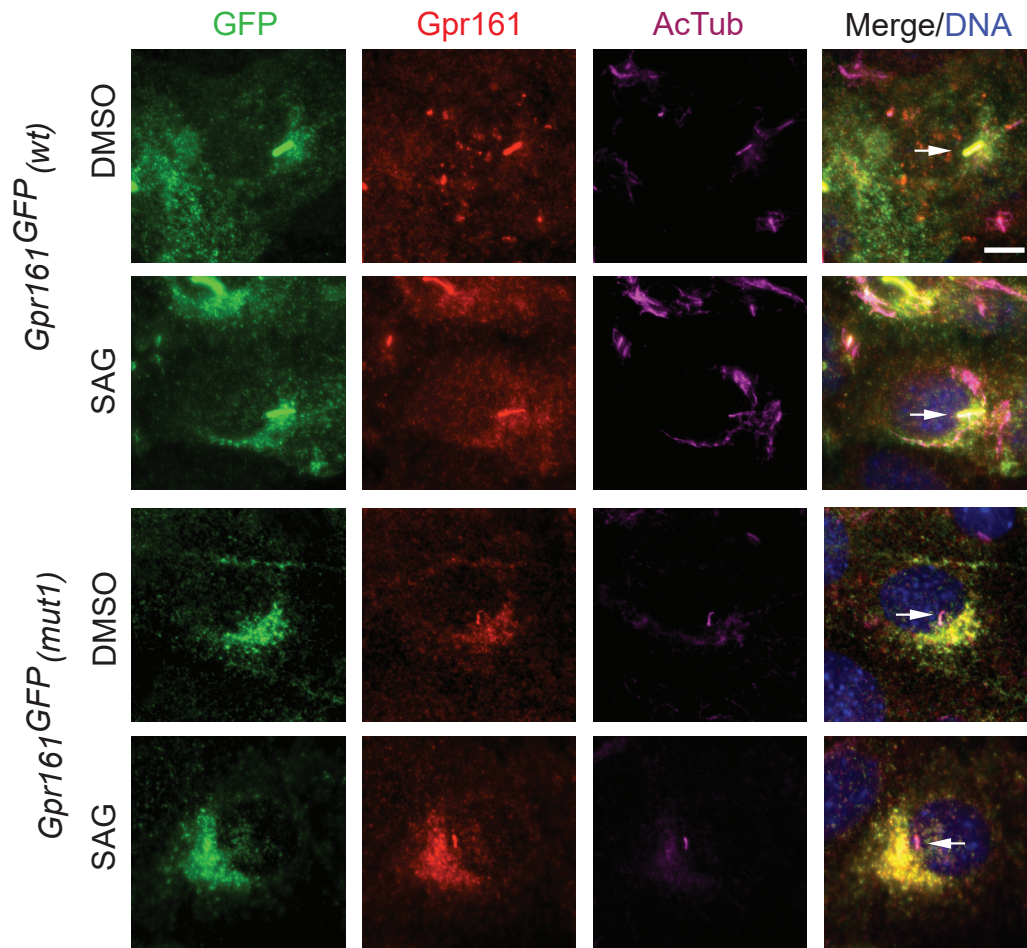

Arrb1/Arrb2 dko MEFs

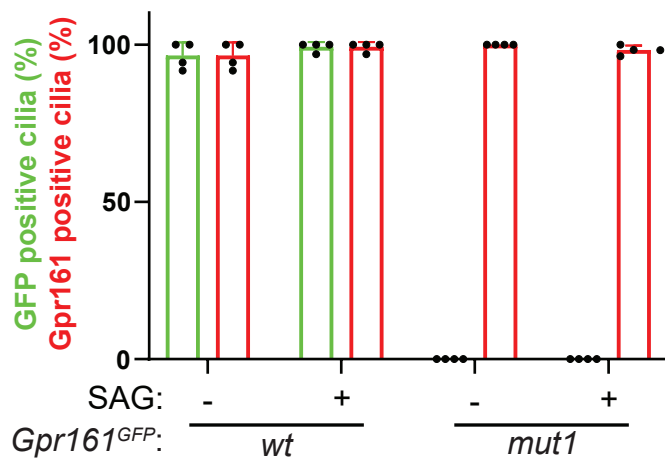

WT MEFs

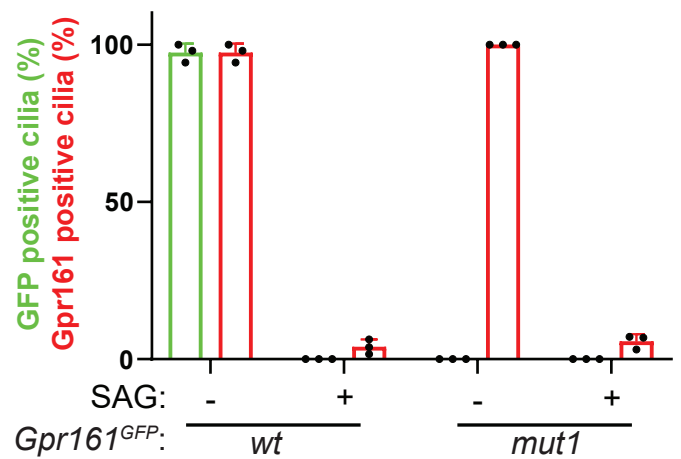

Supplement: supp [file elife-67121-supp-v1.zip]

# Hwang\_Figure 1- Supplement 2

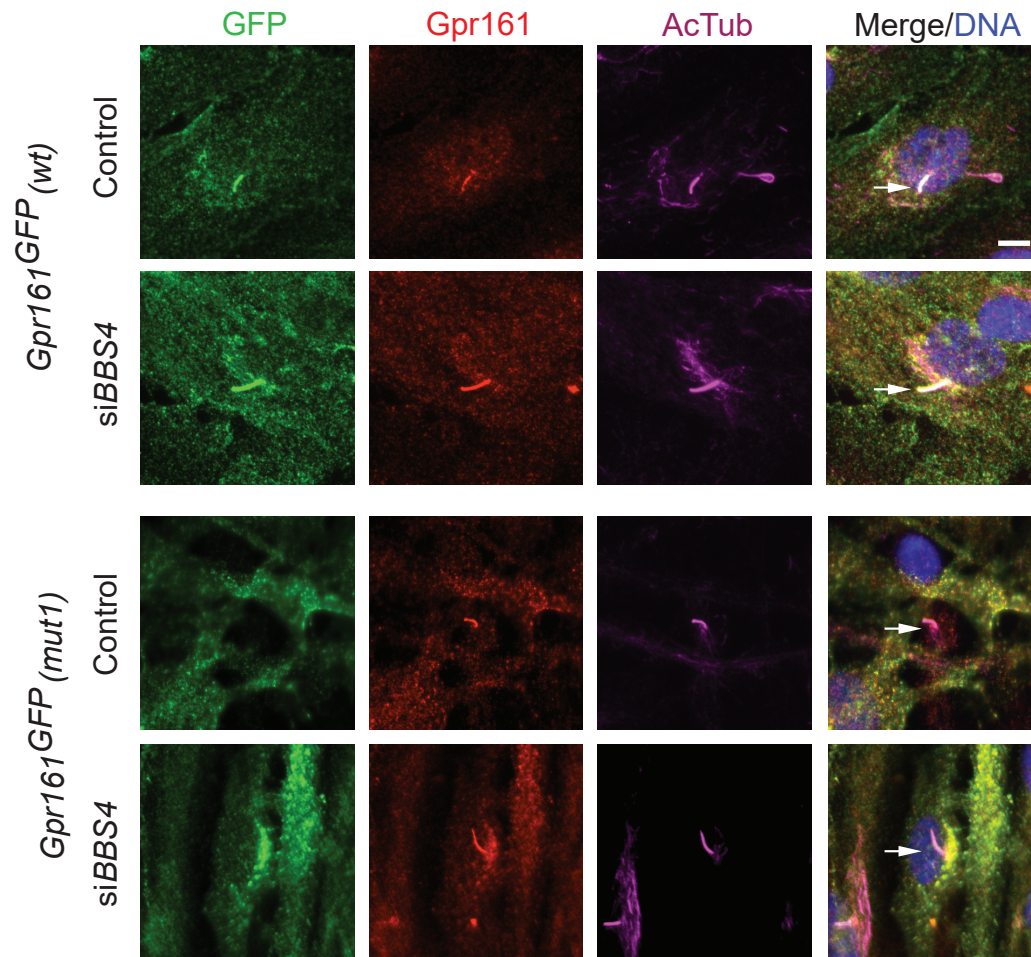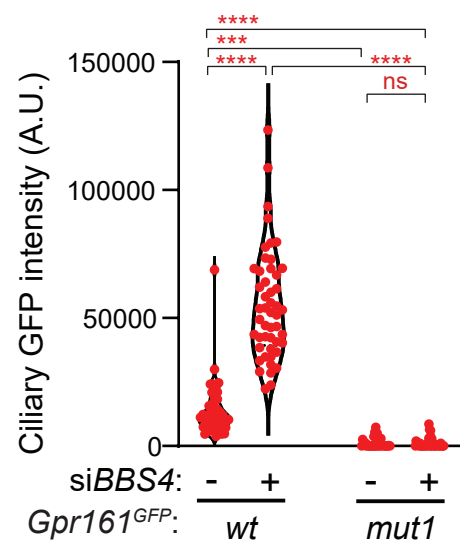

Supplement: supp [file elife-67121-supp-v1.zip]

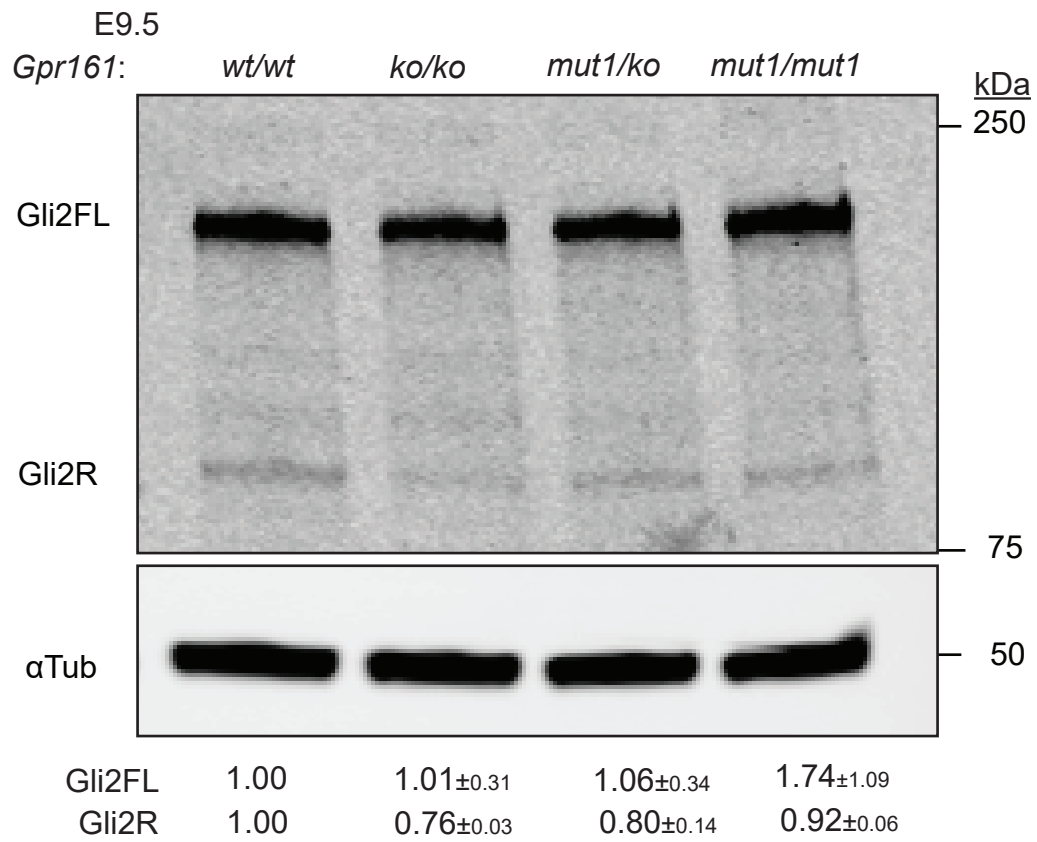

Supplement: supp [file elife-67121-supp-v1.zip]
